# Supplementary material for: Economic Benefits from Managing Coffee Berry Borer (Hypothenemus hampei) in Hawaii
Source: MDPI journal article supplement (doi:10.3390/insects14040350), 2023-04-01
Supplement: s1 [file s1]

**Table S1.** Regional Hawaii coffee acreage (values reported in blue vs. all other values missing).

| Year | Kona | Kau | Puna | Hamakua | Oahu | Maui | Kauai | Molokai |
|------|------|-----|------|---------|------|------|-------|---------|
| 2006 |      |     |      |         |      |      |       |         |
| 2007 |      |     |      |         |      |      |       |         |
| 2008 |      |     |      |         |      |      |       |         |
| 2009 |      |     |      |         |      |      |       |         |
| 2010 |      |     |      |         |      |      |       |         |
| 2011 |      |     |      |         |      |      |       |         |
| 2012 |      |     |      |         |      |      |       |         |
| 2013 | 3800 | 500 |      | 125     | 160  |      | 2413  |         |
| 2014 |      |     |      |         |      | 390  | 2450  |         |
| 2015 | 3800 | 660 | 70   |         | 175  | 420  | 3000  | 123     |
| 2016 |      | 500 | 70   |         | 155  | 315  | 2515  |         |
| 2017 |      |     |      |         |      |      |       |         |
| 2018 |      |     |      |         |      |      |       |         |
| 2019 |      |     |      |         |      |      |       |         |
| 2020 |      |     |      |         |      |      |       |         |
| 2021 |      |     |      |         |      |      |       |         |

**Table S2.** Estimated and calibrated regional Hawaii bearing coffee acreage ( $a_{ht}$ ). Values highlighted in blue represent those for which regional estimates were available (see Table S1 for comparison).

| Year | Kona | Kau | Puna | Hamakua | Oahu | Maui | Kauai | Molokai |
|------|------|-----|------|---------|------|------|-------|---------|
| 2006 | 3679 | 484 | 68   | 121     | 155  | 363  | 2512  | 119     |
| 2007 | 3679 | 484 | 68   | 121     | 155  | 363  | 2512  | 119     |
| 2008 | 3679 | 484 | 68   | 121     | 155  | 363  | 2512  | 119     |
| 2009 | 3679 | 484 | 68   | 121     | 155  | 363  | 2512  | 119     |
| 2010 | 3679 | 484 | 68   | 121     | 155  | 363  | 2512  | 119     |
| 2011 | 3777 | 497 | 70   | 124     | 159  | 373  | 2579  | 122     |
| 2012 | 3875 | 510 | 71   | 127     | 163  | 382  | 2646  | 125     |
| 2013 | 4118 | 542 | 76   | 135     | 173  | 406  | 2615  | 133     |
| 2014 | 3847 | 587 | 71   | 127     | 170  | 395  | 2480  | 125     |
| 2015 | 3131 | 544 | 58   | 103     | 144  | 346  | 2472  | 101     |
| 2016 | 3499 | 460 | 64   | 115     | 143  | 290  | 2316  | 113     |
| 2017 | 3493 | 533 | 64   | 115     | 152  | 345  | 2385  | 113     |
| 2018 | 3445 | 526 | 63   | 113     | 150  | 340  | 2352  | 111     |
| 2019 | 3348 | 511 | 62   | 110     | 145  | 330  | 2286  | 108     |
| 2020 | 3348 | 511 | 62   | 110     | 145  | 330  | 2286  | 108     |
| 2021 | 3348 | 511 | 62   | 110     | 145  | 330  | 2286  | 108     |

**Table S3.** Hawaii regional CBB infested acres ( $i_{ht}$ ) from 2006-2021. For each region ( $h$ ) the year of CBB introduction ( $\tau_h$ ) is shown in parentheses.

| <b>Year</b> | <b>Kona<br/>(2010)</b> | <b>Kau<br/>(2011)</b> | <b>Puna<br/>(2012)</b> | <b>Hamakua<br/>(2013)</b> | <b>Oahu<br/>(2014)</b> | <b>Maui<br/>(2015)</b> | <b>Kauai<br/>(2020)</b> | <b>Molokai<br/>(2021)</b> |
|-------------|------------------------|-----------------------|------------------------|---------------------------|------------------------|------------------------|-------------------------|---------------------------|
| 2006        | 0                      | 0                     | 0                      | 0                         | 0                      | 0                      | 0                       | 0                         |
| 2007        | 0                      | 0                     | 0                      | 0                         | 0                      | 0                      | 0                       | 0                         |
| 2008        | 0                      | 0                     | 0                      | 0                         | 0                      | 0                      | 0                       | 0                         |
| 2009        | 0                      | 0                     | 0                      | 0                         | 0                      | 0                      | 0                       | 0                         |
| 2010        | 1839                   | 0                     | 0                      | 0                         | 0                      | 0                      | 0                       | 0                         |
| 2011        | 3588                   | 248                   | 0                      | 0                         | 0                      | 0                      | 0                       | 0                         |
| 2012        | 3681                   | 484                   | 36                     | 0                         | 0                      | 0                      | 0                       | 0                         |
| 2013        | 3913                   | 515                   | 72                     | 68                        | 0                      | 0                      | 0                       | 0                         |
| 2014        | 3654                   | 558                   | 67                     | 120                       | 85                     | 0                      | 0                       | 0                         |
| 2015        | 2975                   | 517                   | 55                     | 98                        | 137                    | 173                    | 0                       | 0                         |
| 2016        | 3324                   | 437                   | 61                     | 109                       | 136                    | 276                    | 0                       | 0                         |
| 2017        | 3318                   | 507                   | 61                     | 109                       | 144                    | 327                    | 0                       | 0                         |
| 2018        | 3272                   | 499                   | 60                     | 108                       | 142                    | 323                    | 0                       | 0                         |
| 2019        | 3180                   | 485                   | 59                     | 105                       | 138                    | 314                    | 0                       | 0                         |
| 2020        | 3180                   | 485                   | 59                     | 105                       | 138                    | 314                    | 1143                    | 0                         |
| 2021        | 3180                   | 485                   | 59                     | 105                       | 138                    | 314                    | 2171                    | 54                        |

**Table S4.** Parameter values for the proportion of coffee berry borer infested acres managed ( $v_{jt}$ ) over time using *Beauveria bassiana* only, early IPM, and research-based IPM.

| Year<br>(t)      | Management technology          |                   |                    |
|------------------|--------------------------------|-------------------|--------------------|
|                  | <i>B. bassiana</i> only        | Early IPM         | Research based IPM |
|                  | Year technology was introduced |                   |                    |
|                  | 2011                           | 2013              | 2016               |
|                  | $v_{Bt}$                       | $v_{Ct}$          | $v_{Dt}$           |
| <2010            | 0                              | 0                 | 0                  |
| 2010, 2011, 2012 | $M_t/A_t$                      | 0                 | 0                  |
| 2013             | $1-v_{Ct}$                     | 0.16              | 0                  |
| 2014             | $1-v_{Ct}$                     | 0.23              | 0                  |
| 2015             | $1-v_{Ct}$                     | 0.50              | 0                  |
| 2016             | 0.19                           | $1-v_{Bt}-v_{Dt}$ | 0.16               |
| 2017             | 0.20                           | $1-v_{Bt}-v_{Dt}$ | 0.23               |
| 2018             | 0.18                           | $1-v_{Bt}-v_{Dt}$ | 0.50               |
| 2019, 2020, 2021 | 0.086                          | $1-v_{Bt}-v_{Dt}$ | 0.50               |

**Table S5.** Baseline coffee acreage ( $a_{jt}$ ) distribution in Hawaii from 2006-2021. Total bearing acreage is the sum of all infested and uninfested acres, managed acres is the sum of the three IPM scenarios, and infested acres is the sum of managed and unmanaged acres.

| Year<br>(t) | Total<br>bearing<br>acres ( $A_t$ ) | Sums to total acres ( $A_t$ ) |                    | Sums to all managed acres ( $M_t$ )     |                           |                                       | Sums to infested acres ( $I_t$ ) |                                       |
|-------------|-------------------------------------|-------------------------------|--------------------|-----------------------------------------|---------------------------|---------------------------------------|----------------------------------|---------------------------------------|
|             |                                     | Uninfested<br>( $U_t$ )       | Infested ( $I_t$ ) | <i>B. bassiana</i><br>only ( $X_{Bt}$ ) | Early IPM<br>( $X_{Ct}$ ) | Research<br>based IPM<br>( $X_{Dt}$ ) | Managed ( $M_t$ )                | Unmanaged<br>( $N_t$ )                |
|             |                                     | $a_{Ft}$                      | $a_{Et}$           | $a_{Bt}$                                | $a_{Ct}$                  | $a_{Dt}$                              | $a_{Bt} + a_{Ct} + a_{Dt}$       | $a_{Et} - (a_{Bt} + a_{Ct} + a_{Dt})$ |
| 2006        | 6300                                | 6300                          | 0                  |                                         |                           |                                       | 0                                | 0                                     |
| 2007        | 6400                                | 6400                          | 0                  |                                         |                           |                                       | 0                                | 0                                     |
| 2008        | 6900                                | 6900                          | 0                  |                                         |                           |                                       | 0                                | 0                                     |
| 2009        | 6300                                | 6300                          | 0                  |                                         |                           |                                       | 0                                | 0                                     |
| 2010        | 7500                                | 5661                          | 1839               |                                         |                           |                                       | 0                                | 1839                                  |
| 2011        | 7700                                | 3864                          | 3836               | 614                                     |                           |                                       | 614                              | 3223                                  |
| 2012        | 7900                                | 3699                          | 4201               | 964                                     |                           |                                       | 964                              | 3237                                  |
| 2013        | 8200                                | 3633                          | 4567               | 1510                                    | 731                       |                                       | 2241                             | 2326                                  |
| 2014        | 7800                                | 3316                          | 4484               | 2582                                    | 1031                      |                                       | 3613                             | 871                                   |
| 2015        | 6900                                | 2946                          | 3954               | 1110                                    | 1977                      |                                       | 3087                             | 867                                   |
| 2016        | 7000                                | 2657                          | 4343               | 825                                     | 1914                      | 695                                   | 3434                             | 909                                   |
| 2017        | 7200                                | 2733                          | 4467               | 893                                     | 1720                      | 1027                                  | 3641                             | 826                                   |
| 2018        | 7100                                | 2695                          | 4405               | 793                                     | 705                       | 2202                                  | 3700                             | 705                                   |
| 2019        | 6900                                | 2619                          | 4281               | 368                                     | 1087                      | 2140                                  | 3596                             | 685                                   |
| 2020        | 6900 <sup>1</sup>                   | 1476                          | 5424               | 466                                     | 600                       | 2712                                  | 3779                             | 1645                                  |
| 2021        | 6900 <sup>1</sup>                   | 394                           | 6506               | 560                                     | 283                       | 3253                                  | 4095                             | 2411                                  |

<sup>1</sup>Data source: [Coffee 01/26/2021 usda.gov](https://coffee.01/26/2021.usda.gov) (USDA-NASS online reports a different value).

**Table S6.** Proportion of total coffee acreage ( $\omega_{jt}$ ) that is infested ( $I_t$ ), uninfested ( $U_t$ ), managed (*B. bassiana* only =  $v_{Bt}$ , early IPM =  $v_{Ct}$ , and research-based IPM =  $v_{Dt}$ ) and unmanaged ( $N_t$ ).

| Management type (j) | $\omega_{jt}$   | Infestation Status | Management Status     |
|---------------------|-----------------|--------------------|-----------------------|
| <b>B</b>            | $v_{Bt}I_t/A_t$ | Infested           | Managed               |
| <b>C</b>            | $v_{Ct}I_t/A_t$ | Infested           | Managed               |
| <b>D</b>            | $v_{Dt}I_t/A_t$ | Infested           | Managed               |
| <b>E</b>            | $N_t/A_t$       | Infested           | Unmanaged             |
| <b>F</b>            | $U_t/A_t$       | Uninfested         | Management not needed |

**Table S7.** Coffee prices per pound (US\$) under the hypothetical scenario without CBB management.

| <b>Year (<i>t</i>)</b> | <b>Uninfested coffee price (<math>p_{Ft}</math>)</b> | <b>Infested unmanaged coffee price (<math>p_{Et}</math>)</b> |
|------------------------|------------------------------------------------------|--------------------------------------------------------------|
| 2006                   | \$7.65                                               |                                                              |
| 2007                   | \$8.20                                               |                                                              |
| 2008                   | \$6.80                                               |                                                              |
| 2009                   | \$3.60                                               |                                                              |
| 2010                   | \$4.12                                               | \$1.85                                                       |
| 2011                   | \$4.94                                               | \$2.22                                                       |
| 2012                   | \$7.05                                               | \$3.17                                                       |
| 2013                   | \$7.10                                               | \$3.19                                                       |
| 2014                   | \$9.95                                               | \$4.48                                                       |
| 2015                   | \$10.17                                              | \$4.58                                                       |
| 2016                   | \$11.97                                              | \$5.39                                                       |
| 2017                   | \$11.88                                              | \$5.35                                                       |
| 2018                   | \$14.09                                              | \$6.34                                                       |
| 2019                   | \$14.78                                              | \$6.65                                                       |
| 2020                   | \$12.90                                              | \$5.80                                                       |
| 2021                   | \$13.56                                              | \$6.10                                                       |

<sup>1</sup>Index j = Uninfested (F) and Infested unmanaged (E); relative yield multiplier ( $\rho_j$ ) for F = 100%, E = 45%.

**Table S8.** Observed coffee yield (parchment pounds per acre), yield without any CBB management, and the gain in yield due to all combined types of CBB management.

| <b>Year</b> | <b>Observed yield<br/>(lbs/acre)</b> | <b>Yield without CBB<br/>management (lbs/acre)</b> | <b>Yield gain with CBB<br/>management (lbs/acre)</b> | <b>Gain<br/>(%)</b> |
|-------------|--------------------------------------|----------------------------------------------------|------------------------------------------------------|---------------------|
| 2006        | 1175                                 | 1175                                               | 0                                                    | 0.0                 |
| 2007        | 1172                                 | 1172                                               | 0                                                    | 0.0                 |
| 2008        | 1261                                 | 1261                                               | 0                                                    | 0.0                 |
| 2009        | 1208                                 | 1208                                               | 0                                                    | 0.0                 |
| 2010        | 1173                                 | 1173                                               | 0                                                    | 0.0                 |
| 2011        | 987                                  | 961                                                | 26                                                   | 2.6                 |
| 2012        | 886                                  | 851                                                | 35                                                   | 4.0                 |
| 2013        | 1024                                 | 925                                                | 99                                                   | 9.7                 |
| 2014        | 962                                  | 814                                                | 147                                                  | 15.3                |
| 2015        | 957                                  | 799                                                | 157                                                  | 16.5                |
| 2016        | 771                                  | 619                                                | 152                                                  | 19.8                |
| 2017        | 840                                  | 667                                                | 173                                                  | 20.6                |
| 2018        | 965                                  | 746                                                | 219                                                  | 22.7                |
| 2019        | 928                                  | 713                                                | 215                                                  | 23.2                |
| 2020        | 949                                  | 693                                                | 256                                                  | 27.0                |
| 2021        | 949                                  | 647                                                | 302                                                  | 31.8                |

**Table S9.** Observed price for coffee (US\$ per pound of parchment), price without CBB management, and price gain due to CBB management.

| <b>Year</b> | <b>Observed Price<br/>(US\$/lb)</b> | <b>Price without<br/>CBB<br/>management<br/>(US\$/lb)</b> | <b>Price gain with<br/>CBB<br/>management<br/>(US\$/lb)</b> | <b>Gain (%)</b> |
|-------------|-------------------------------------|-----------------------------------------------------------|-------------------------------------------------------------|-----------------|
| 2006        | 7.65                                | 7.65                                                      | 0                                                           | 0.0             |
| 2007        | 8.20                                | 8.20                                                      | 0                                                           | 0.0             |
| 2008        | 6.80                                | 6.80                                                      | 0                                                           | 0.0             |
| 2009        | 3.60                                | 3.60                                                      | 0                                                           | 0.0             |
| 2010        | 3.80                                | 3.80                                                      | 0                                                           | 0.0             |
| 2011        | 4.15                                | 4.04                                                      | 0.11                                                        | 2.7             |
| 2012        | 5.90                                | 5.64                                                      | 0.26                                                        | 4.3             |
| 2013        | 6.20                                | 5.59                                                      | 0.61                                                        | 9.8             |
| 2014        | 9.12                                | 7.74                                                      | 1.38                                                        | 15.1            |
| 2015        | 9.38                                | 7.93                                                      | 1.45                                                        | 15.5            |
| 2016        | 11.10                               | 9.01                                                      | 2.09                                                        | 18.8            |
| 2017        | 11.10                               | 8.94                                                      | 2.16                                                        | 19.4            |
| 2018        | 13.40                               | 10.61                                                     | 2.79                                                        | 20.8            |
| 2019        | 14.10                               | 11.13                                                     | 2.97                                                        | 21.1            |
| 2020        | 11.70                               | 8.30                                                      | 3.40                                                        | 29.0            |
| 2021        | 11.70                               | 6.91                                                      | 4.79                                                        | 41.0            |



**Table S10.** Observed average revenue (US\$ per acre) for Hawaii-grown coffee, average revenue without CBB management, and gain in average revenue due to CBB management.

| <b>Year</b> | <b>Observed revenue<br/>(US\$/acre)</b> | <b>Revenue without CBB<br/>management (US\$/acre)</b> | <b>Revenue gain with CBB<br/>management (US\$/acre)</b> | <b>Gain (%)</b> |
|-------------|-----------------------------------------|-------------------------------------------------------|---------------------------------------------------------|-----------------|
| 2006        | 8,986                                   | 8,986                                                 | 0                                                       | 0               |
| 2007        | 9,609                                   | 9,609                                                 | 0                                                       | 0               |
| 2008        | 8,574                                   | 8,574                                                 | 0                                                       | 0               |
| 2009        | 4,350                                   | 4,350                                                 | 0                                                       | 0               |
| 2010        | 4,459                                   | 4,459                                                 | 0                                                       | 0               |
| 2011        | 4,096                                   | 3,880                                                 | 216                                                     | 5               |
| 2012        | 5,228                                   | 4,802                                                 | 426                                                     | 8               |
| 2013        | 6,351                                   | 5,173                                                 | 1,178                                                   | 19              |
| 2014        | 8,769                                   | 6,305                                                 | 2,464                                                   | 28              |
| 2015        | 8,972                                   | 6,333                                                 | 2,639                                                   | 29              |
| 2016        | 8,563                                   | 5,579                                                 | 2,984                                                   | 35              |
| 2017        | 9,327                                   | 5,968                                                 | 3,359                                                   | 36              |
| 2018        | 12,928                                  | 7,913                                                 | 5,015                                                   | 39              |
| 2019        | 13,078                                  | 7,928                                                 | 5,150                                                   | 39              |
| 2020        | 11,107                                  | 5,756                                                 | 5,350                                                   | 48              |
| 2021        | 11,107                                  | 4,470                                                 | 6,637                                                   | 60              |

**Table S11.** Hawaii Statewide observed average revenue (US\$ million per year), average revenue without CBB management, and gain in revenue due to CBB management.

| <b>Year</b> | <b>Observed<br/>revenue<br/>(US\$M/year)</b> | <b>Revenue without<br/>management<br/>(US\$M/year)</b> | <b>Revenue gain<br/>(US\$M/year)</b> | <b>Gain (%)</b> |
|-------------|----------------------------------------------|--------------------------------------------------------|--------------------------------------|-----------------|
| 2006        | 56.61                                        | 56.61                                                  | 0                                    | 0.0             |
| 2007        | 61.5                                         | 61.50                                                  | 0                                    | 0.0             |
| 2008        | 59.2                                         | 59.16                                                  | 0                                    | 0.0             |
| 2009        | 27.4                                         | 27.41                                                  | 0                                    | 0.0             |
| 2010        | 33.44                                        | 33.44                                                  | 0                                    | 0.0             |
| 2011        | 31.54                                        | 29.88                                                  | 1.66                                 | 5.3             |
| 2012        | 41.3                                         | 37.93                                                  | 3.37                                 | 8.2             |
| 2013        | 52.1                                         | 42.42                                                  | 9.66                                 | 18.5            |
| 2014        | 68.4                                         | 49.18                                                  | 19.22                                | 28.1            |
| 2015        | 61.9                                         | 43.70                                                  | 18.21                                | 29.4            |
| 2016        | 59.9                                         | 39.05                                                  | 20.89                                | 34.8            |
| 2017        | 67.2                                         | 42.97                                                  | 24.19                                | 36.0            |
| 2018        | 91.8                                         | 56.18                                                  | 35.61                                | 38.8            |
| 2019        | 90.2                                         | 54.71                                                  | 35.53                                | 39.4            |
| 2020        | 76.6                                         | 39.72                                                  | 36.92                                | 48.2            |
| 2021        | 76.6                                         | 30.84                                                  | 45.79                                | 59.8            |

**Table S12.** Observed average Hawaii Statewide coffee revenue (US\$ million per year), revenue without CBB management, and revenue gain from CBB management by management type.

| Year | Observed revenue | Revenue without CBB management | Revenue Gain            |           |                    | Gain (%) |
|------|------------------|--------------------------------|-------------------------|-----------|--------------------|----------|
|      |                  |                                | <i>B. bassiana</i> only | Early IPM | Research-based IPM |          |
| 2006 | 56.61            | 56.61                          |                         |           |                    | 0        |
| 2007 | 61.50            | 61.50                          |                         |           |                    | 0        |
| 2008 | 59.16            | 59.16                          |                         |           |                    | 0        |
| 2009 | 27.41            | 27.41                          |                         |           |                    | 0        |
| 2010 | 33.44            | 33.44                          |                         |           |                    | 0        |
| 2011 | 31.54            | 29.88                          | 1.66                    | 0         |                    | 5        |
| 2012 | 41.30            | 37.93                          | 3.37                    | 0         |                    | 8        |
| 2013 | 52.08            | 42.42                          | 5.88                    | 3.78      |                    | 19       |
| 2014 | 68.40            | 49.18                          | 12.56                   | 6.66      |                    | 28       |
| 2015 | 61.91            | 43.70                          | 5.41                    | 12.80     |                    | 29       |
| 2016 | 59.94            | 39.05                          | 3.79                    | 11.68     | 5.41               | 35       |
| 2017 | 67.16            | 42.97                          | 4.39                    | 11.23     | 8.56               | 36       |
| 2018 | 91.79            | 56.18                          | 5.17                    | 6.10      | 24.34              | 39       |
| 2019 | 90.24            | 54.71                          | 2.41                    | 9.43      | 23.70              | 39       |
| 2020 | 76.64            | 39.72                          | 2.94                    | 5.02      | 28.96              | 48       |
| 2021 | 76.64            | 30.84                          | 3.97                    | 2.66      | 39.16              | 60       |
